# Supplementary material for: What Do Nectarivorous Bats Like? Nectar Composition in Bromeliaceae With Special Emphasis on Bat-Pollinated Species
Source: PubMed Central journal article supplement (PMC6393375; doi:10.3389/fpls.2019.00205), 2019-02-21
Supplement: Data_Sheet_3.pdf [file Data_Sheet_3.pdf]

*Supplementary Material*

**What do nectarivorous bats like? Nectar composition in Bromeliaceae with special emphasis on bat-pollinated species**

**Author: Thomas Göttlinger, Michael Schwerdtfeger, Kira Tiedge, Gertrud Lohaus\***

**\*Correspondence: Gertrud Lohaus (lohaus@uni-wuppertal.de)**

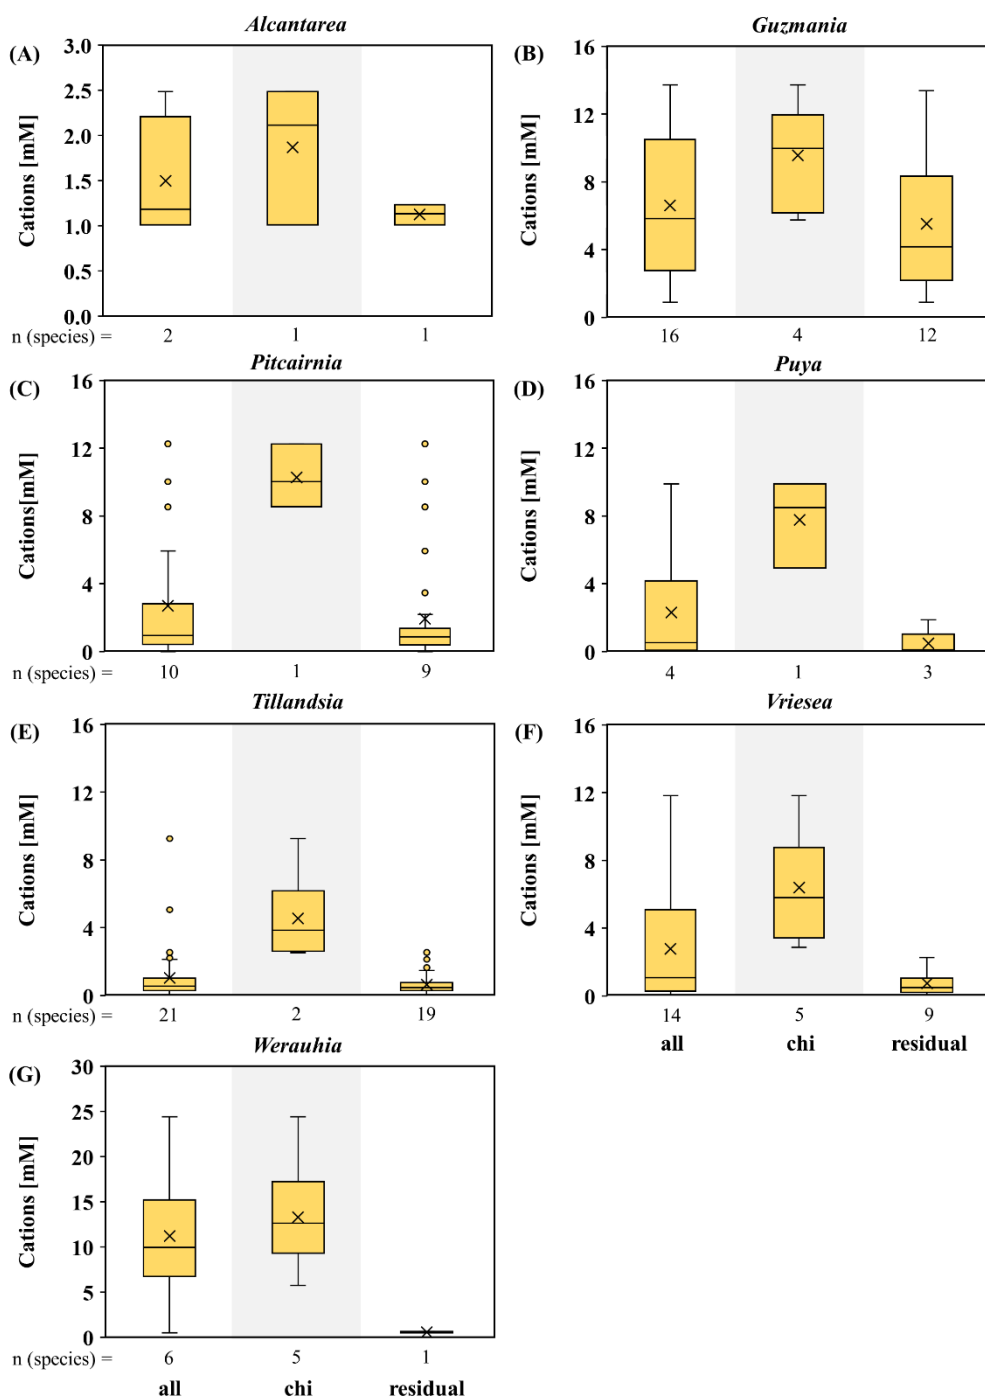

**Supplementary Figure S3:** Cation concentrations ( $\text{Ca}^{2+}$ ,  $\text{K}^+$ ,  $\text{Na}^+$ ,  $\text{Mg}^{2+}$ ) in nectar of seven genera of Bromeliaceae (*Alcantarea* (A), *Guzmania* (B), *Pitcairnia* (C), *Puya* (D), *Tillandsia* (E), *Vriesea* (F), *Werauhia* (G)), which include bat-pollinated species. The box plots show medians (horizontal line in box) and means (x in box).
