# Supplementary material for: What Do Nectarivorous Bats Like? Nectar Composition in Bromeliaceae With Special Emphasis on Bat-Pollinated Species
Source: Front Plant Sci. 2019 Feb 21;10:205. doi: 10.3389/fpls.2019.00205 (PMC6393375; doi:10.3389/fpls.2019.00205)
Supplement: Supplementary file 5 [file Table_5.docx]

Supplementary Material

What do nectarivorous bats like? Nectar composition in Bromeliaceae with special emphasis on bat-pollinated species

**Author: Thomas Göttlinger, Michael Schwerdtfeger, Kira Tiedge, Gertrud Lohaus***

***Correspondence:** Gertrud Lohaus (lohaus@uni-wuppertal.de)

**Supplementary Table S5:** Results of the PERMANOVA taking into account the individual components of nectar (corresponding Table 1).R2 describes the influence of the pollinator, the genus and the botanical garden on the nectar composition.

|  | **Degrees of freedom (df)** | **Pseudo-F (F)** | **R2** | ***p*-value** |
| --- | --- | --- | --- | --- |
| *Sugar [mM]* | | | | |
| Pollinator | 1 | 85.90 | 0.41 | 0.001 *** |
| Genus | 6 | 2.13 | 0.06 | 0.019 * |
| Bot. garden | 3 | 1.68 | 0.02 | 0.125 |
| Pollinator x Genus | 6 | 2.52 | 0.07 | 0.007 ** |
| Pollinator x Bot. garden | 3 | 1.92 | 0.03 | 0.079 |
| Genus x Bot. garden | 1 | 2.85 | 0.01 | 0.064 |
| Pollinator x Genus x Bot. garden | 1 | 14.38 | 0.07 | 0.001 *** |
| Residuals | 68 |  | 0.32 |  |
| Total | 89 |  | 1.00 |  |
| *Amino acids [mM]* | | | | |
| Pollinator | 1 | 26.35 | 0.03 | 0.001 *** |
| Genus | 6 | 54.20 | 0.37 | 0.001 *** |
| Bot. garden | 3 | 8.62 | 0.03 | 0.001 *** |
| Pollinator x Genus | 6 | 61.05 | 0.42 | 0.001 *** |
| Pollinator x Bot. garden | 3 | 6.65 | 0.02 | 0.001 *** |
| Genus x Bot. garden | 1 | 21.11 | 0.02 | 0.001 *** |
| Pollinator x Genus x Bot. garden | 1 | 19.24 | 0.02 | 0.001 *** |
| Residuals | 68 |  | 0.08 |  |
| Total | 89 |  | 1.00 |  |
| *Inorganic ions and organic acids [mM]* | | | | |
| Pollinator | 1 | 73.03 | 0.34 | 0.001 *** |
| Genus | 6 | 6.28 | 0.18 | 0.001 *** |
| Bot. garden | 3 | 5.06 | 0.07 | 0.002 ** |
| Pollinator x Genus | 6 | 2.21 | 0.06 | 0.011 * |
| Pollinator x Bot. garden | 3 | 1.49 | 0.02 | 0.198 |
| Genus x Bot. garden | 1 | 1.97 | 0.01 | 0.144 |
| Pollinator x Genus x Bot. garden | 1 | 1.20 | 0.01 | 0.266 |
| Residuals | 68 |  | 0.32 |  |
| Total | 89 |  | 1.00 |  |
